# Supplementary material for: SO 2 and NH 3 emissions enhance organosulfur compounds and fine particles formation from the photooxidation of a typical aromatic hydrocarbon
Source: Copernicus journal article supplement (doi:10.5194/acp-2021-61), 2021-01-22
Supplement: Supplementary file [file acp-2021-61-AC3-supplement.pdf]

We sincerely thank the Referee for the valuable comments. Our manuscript has been revised according to the comments from the Referee and our responses to the comments are as follows. For clarity, the comments are reproduced in blue, authors' responses are in black and changes in the manuscript are in red.

5

### Responses to Anonymous Referee #3

#### Overview:

The manuscript by Yang et al. examined the effect of SO<sub>2</sub> and NH<sub>3</sub> on the formation of SOA from 1,2,4-trimethylbenzene photooxidation. After the injection of SO<sub>2</sub> and/or NH<sub>3</sub>, the apparent yield of the SOA increased after wall loss correction, which demonstrated the synergistic effect of SO<sub>2</sub> and NH<sub>3</sub> in facilitating SOA formation. The authors also used ATR-FTIR, IC, and UPLC-MS to systematically analyze the particle phase composition and identified various inorganic and organo-sulfates compounds.

10

15 My main comments are about the control experiment setup in this manuscript, which are discussed below. Other than the main comments, the manuscript is written clearly and comprehensive.

#### Major Comments:

The authors demonstrate that the addition of SO<sub>2</sub> and/or NH<sub>3</sub> during the photo-oxidation experiments can enhance the SOA formation and yield. However, part of the aerosol growth can arise from the formation of H<sub>2</sub>SO<sub>4</sub> or (NH<sub>4</sub>)<sub>2</sub>SO<sub>4</sub> particles even without the presence of any SOA, which should be deducted from the enhancement effect of SO<sub>2</sub> and/or NH<sub>3</sub>. I suggest the authors add in three control experiments (pure SO<sub>2</sub>, pure NH<sub>3</sub>, and SO<sub>2</sub>+NH<sub>3</sub> mixtures but with similar levels of OH radicals and UV intensity using H<sub>2</sub>O<sub>2</sub> or other OH generators) without any VOCs to rule out the formation of inorganic species contributing to the SOA.

20

25

#### Author Reply:

In the SO<sub>2</sub>-added experiments, H<sub>2</sub>SO<sub>4</sub> can be produced by OH oxidation of SO<sub>2</sub> upon photooxidation. With the coexistence of SO<sub>2</sub> and NH<sub>3</sub>, the formed H<sub>2</sub>SO<sub>4</sub> can be

30 neutralized by  $\text{NH}_3$  to form  $(\text{NH}_4)_2\text{SO}_4$  particles. Therefore, the addition of  $\text{SO}_2$  and/or  
35  $\text{NH}_3$  to the TMB/ $\text{NO}_x$  mixtures can lead to the increase in the volume concentration of  
aerosol particles by the formation of inorganic species and/or the enhanced organic  
products (Ye et al., 2018; Jaoui et al., 2008; Liu et al., 2019). In the present study, we  
discussed the  $\text{SO}_2$  dependence of the SOA yield as shown in Fig. 4, and we showed the  
role of  $\text{NH}_3$  in the total particle number and volume concentrations (as discussed in Sect.  
3.2.1). We believe that the introduction of  $\text{SO}_2$  can enhance SOA yield based on our  
careful analysis as following:

(1) Some studies on the effects of  $\text{SO}_2$  and/or  $\text{NH}_3$  on SOA formation employed  
aerosol mass spectrometer to measure in-situ the inorganic and organic components in  
40 aerosol particles (Liu et al., 2016; Chen et al., 2019). For our online measurement of  
aerosol particles, we solely used SMPS, whose data are insufficient to quantitatively  
explain the contribution of organic aerosols to the increase in aerosol mass. Offline  
measurement methods are also commonly adopted in chamber studies. Ion  
chromatography (IC) is one of the most widely used instruments providing inorganic  
45 aerosol information. Kleindienst et al. (2006) investigated the  $\text{SO}_2$  effects on SOA  
yields from the isoprene/ $\text{NO}_x$ / $\text{SO}_2$  photooxidation and used IC to determine the mass  
concentrations of inorganic components. Jiang et al. (2020) revealed the influences of  
 $\text{SO}_2$  and  $\text{NH}_3$  on furan SOA yield based on SMPS and IC measurements. In this work,  
the concentrations of inorganic ions were measured through IC. To determine the net  
50 SOA yield, the mass of inorganic components was subtracted from the total particle  
mass based on IC and SMPS data as mentioned in Sect. 3.1.2 in the original manuscript  
(Jiang et al., 2020). When  $\text{SO}_2$  initial levels increased from 0 to 200 ppb, the net SOA  
yield increased from 3.8% to 17.6% in the low- $\text{NO}_x$  regime. Similarly, elevating  $\text{SO}_2$   
initial concentration to 228 ppb under high- $\text{NO}_x$  condition enhanced the net SOA yield  
55 by a factor of 3.49. The promoting effects of  $\text{SO}_2$  on SOA yields were in line with  
previous studies (Chen et al., 2019; Liu et al., 2019).

(2) We used an estimation method to explore the contribution of the generated  
 $\text{H}_2\text{SO}_4$  to the particle formation enhancement in TMB/ $\text{NO}_x$ / $\text{SO}_2$  photooxidation, where

we assumed the full conversion of the consumed SO<sub>2</sub> into H<sub>2</sub>SO<sub>4</sub> aerosol particles (Ye et al., 2018; Wyche et al., 2009). As shown in Fig. R1, the contribution of the formed H<sub>2</sub>SO<sub>4</sub> to the increase in particle volume concentration was less than 100%. Furthermore, a previous study showed that half of the reacted SO<sub>2</sub> could transform into sulfur-containing organic species during the photooxidation of 1,3,5-trimethylbenzene/o-xylene/octane/toluene (Vivanco et al., 2011). HRMS measurements reveal the OSs production in this work, which may result in the decrease in the amount of H<sub>2</sub>SO<sub>4</sub> in particle phase. Therefore, the enhanced SOA formation is also responsible for the increased particle volume concentration in the presence of SO<sub>2</sub>.

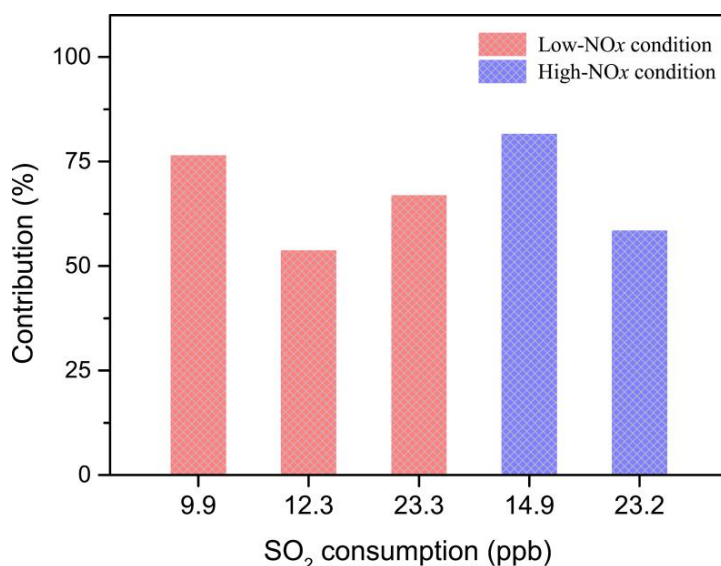

70 **Figure R1.** Contribution (%) of the formed H<sub>2</sub>SO<sub>4</sub> to the increase in particle volume concentration during low-NO<sub>x</sub> and high-NO<sub>x</sub> experiments.

(3) We also performed different experiments without introducing TMB, which could provide significant information about secondary inorganic aerosol formation as suggested by the Referee. In TMB/NO<sub>x</sub>/SO<sub>2</sub> photooxidation, the consumption of 9.9 and 23.3 ppb SO<sub>2</sub> can cause the particle volume concentration to increase by 32.9 and 89.2 μm<sup>3</sup> cm<sup>-3</sup>, respectively. In pure SO<sub>2</sub> photooxidation, the volume concentrations of the formed particles were only 25.3 and 43.2 μm<sup>3</sup> cm<sup>-3</sup> when the consumptions of SO<sub>2</sub> were 9.5 and 24.2 ppb, respectively. Comparison of the results of TMB/NO<sub>x</sub>/SO<sub>2</sub> and

pure SO<sub>2</sub> oxidation experiments demonstrates that the enhancement in aerosol particles  
80 by SO<sub>2</sub> introduction cannot be solely attributed to inorganic aerosol formation.

The yields shown in Table 1, obtained after ruling out the influences of inorganic species, were net SOA yields. Now, the following note was included in Table 1 in the revised manuscript. **For SOA mass calculation, the inorganic mass concentration has been subtracted from the particle mass concentration.**

85

Besides, we have added the following text in the revised manuscript and supplement to provide more evidence about SO<sub>2</sub> effects on the net SOA yield.

Page 14, lines 401–407 in the main manuscript

**We assumed full conversion of the consumed SO<sub>2</sub> into H<sub>2</sub>SO<sub>4</sub> aerosol particles and  
90 found that the contribution of the formed H<sub>2</sub>SO<sub>4</sub> to the increase in particle volume concentration was less than 100% (See Sect. S2). In addition, pure SO<sub>2</sub> oxidation experiments without TMB addition also indicated that the enhancement in aerosol particles by SO<sub>2</sub> introduction cannot be solely attributed to inorganic aerosol formation (See Sect. S2). To calculate the net SOA yield, the inorganic mass concentration was  
95 subtracted from the particle mass concentration based on IC measurements of generated particles.**

Supplement

## **S2. The formed H<sub>2</sub>SO<sub>4</sub> estimation and inorganic mixture experiments**

In order to evaluate the SO<sub>2</sub> effects on SOA formation, we used the method of Ye  
100 et al. (2018) to calculate the contribution of the generated H<sub>2</sub>SO<sub>4</sub> to the particle formation enhancement in TMB/NO<sub>x</sub>/SO<sub>2</sub> photooxidation (Ye et al., 2018; Wyche et al., 2009), where we assumed full conversion of the consumed SO<sub>2</sub> into H<sub>2</sub>SO<sub>4</sub> aerosol particles. The contribution of the formed H<sub>2</sub>SO<sub>4</sub> to the increase in particle volume concentration was less than 100% (Fig. S6), demonstrating that the enhanced SOA  
105 formation is also responsible for the increased particle volume concentration. Additionally, a previous study has shown that half of the reacted SO<sub>2</sub> can transform into sulfur-containing organic species during the photooxidation of 1,3,5-

trimethylbenzene/o-xylene/octane/toluene (Vivanco et al., 2011). HRMS measurements revealed the OSs production in this work, which may result in the decrease in the amount of H<sub>2</sub>SO<sub>4</sub> in the particle phase. Therefore, the enhancement in aerosol particles by SO<sub>2</sub> introduction cannot be solely attributed to inorganic aerosol formation. Pure SO<sub>2</sub> oxidation experiments without introducing TMB were also carried out. In the TMB/NO<sub>x</sub>/SO<sub>2</sub> regime, the consumption of 9.9 and 23.3 ppb SO<sub>2</sub> could cause the particle volume concentration to increase by 32.9 and 89.2 μm<sup>3</sup> cm<sup>-3</sup>, respectively. However, in pure SO<sub>2</sub> oxidation experiments, the volume concentrations of the formed particles were only 25.3 and 43.2 μm<sup>3</sup> cm<sup>-3</sup> when the consumptions of SO<sub>2</sub> were 9.5 and 24.2 ppb, respectively. Comparison of the results of TMB/NO<sub>x</sub>/SO<sub>2</sub> and pure SO<sub>2</sub> oxidation experiments demonstrates that the enhancement in aerosol particles by SO<sub>2</sub> introduction cannot be solely attributed to inorganic aerosol formation.

120

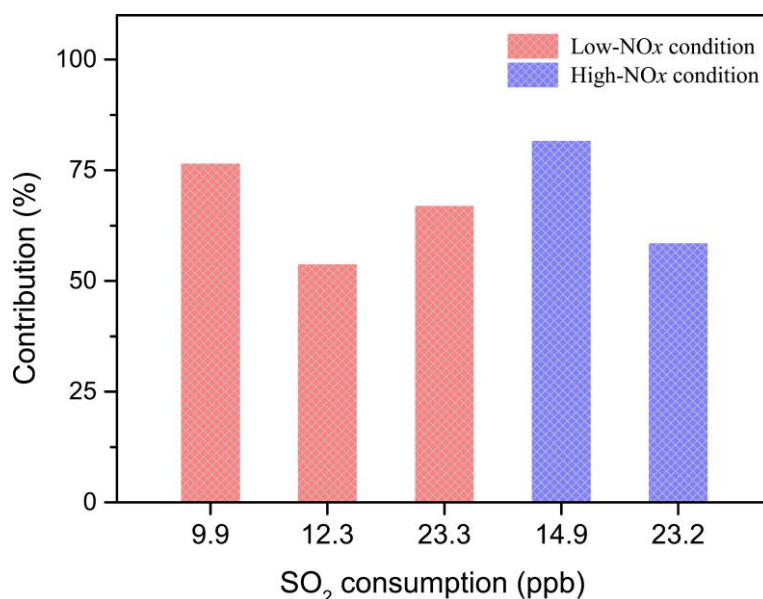

**Figure S6.** Contribution (%) of the formed H<sub>2</sub>SO<sub>4</sub> to the increased particle volume concentration during low-NO<sub>x</sub> and high-NO<sub>x</sub> experiments.

125 Figure S7 shows the mass spectra with and without SO<sub>2</sub> and/or NH<sub>3</sub> are similar, suggesting that maybe inorganic species formed with OH are the likely source of enhancement. It would be important to understand that after ruling out this part of the

inorganic aerosol formation, how much enhancement the SO<sub>2</sub> and/or NH<sub>3</sub> would add to the yield of the SOA.

130 **Author Reply:**

It should be noted that Fig. S7 (now labeled as Fig. S10 in the revised supplement) compared the mass spectra of aerosol particles from NH<sub>3</sub>-free and NH<sub>3</sub>-added experiments. First, we carried out pure NH<sub>3</sub> oxidation experiments and found that aerosol particles were not formed within 480 min of UV irradiation. In addition, the promoting effect of NH<sub>3</sub> on SOA formation was not as strong as that of SO<sub>2</sub> with similar level. Under SO<sub>2</sub>-free condition, the net SOA yield increased slightly from 3.5% to 5.1% as NH<sub>3</sub> initial level increased from 0 to 200 ppb. Our result is consistent with the finding of Chen et al. (2020a), who showed that NH<sub>3</sub> did not significantly affect SOA formation from toluene/NO<sub>x</sub> photooxidation under dry condition. Therefore, the NH<sub>3</sub>-induced changes in the absolute concentrations of organic components might be small in SO<sub>2</sub>-free experiments, leading to similar mass spectra for Fig. S10(a) and Fig. S10(b). Under SO<sub>2</sub>-involved conditions, the introduction of NH<sub>3</sub> resulted in MS differences in the range of  $m/z$  200–400 as presented in Fig. S10(d). The sum of the ion signals in the ranges of 20–199, 200–299, 300–399, and 400–750 were compared in Fig. S11, where it can be seen that the abundance of organic compounds with  $m/z > 200$  were enhanced with the addition of NH<sub>3</sub> in TMB/NO<sub>x</sub>/SO<sub>2</sub> photooxidation.

We have revised the text to explain why the mass spectra of aerosol particles from NH<sub>3</sub>-free and NH<sub>3</sub>-added experiments are similar.

Page 22, lines 640–645

150 As shown in the MS spectra of aerosol samples (Fig. S10), under SO<sub>2</sub>-free condition, the presence of NH<sub>3</sub> did not result in considerable changes in peak numbers and abundance for both positive ion mode and negative ion mode. NH<sub>3</sub> could slightly enhance SOA formation in SO<sub>2</sub>-free experiment as mentioned in Sect. 3.2.1. Therefore, the NH<sub>3</sub>-induced changes in the absolute concentrations of organic components might be small in SO<sub>2</sub>-free experiments, leading to similar mass spectra for Fig. S10(a) and Fig. S10(b). In addition, the major products (Table S4) are likely generated by similar

chemical mechanisms (Fig. 8), which are not sensitive to the change in initial NH<sub>3</sub> levels under current experimental conditions.

160 It is also necessary to show how much enhancement NH<sub>3</sub> would add to the net SOA yield according to the Referee's suggestion. Hence, the following discussions were added in the revised manuscript.

Page 20, lines 565–576

165 However, the effect of NH<sub>3</sub> on particle formation was not as pronounced as that of SO<sub>2</sub> with similar concentration (Fig. 7). In TMB/NO<sub>x</sub>/NH<sub>3</sub> photooxidation, the net SOA yield increased slightly from 3.5% to 5.1% as NH<sub>3</sub> initial level increased from 0 to 200 ppb (Table 1). Our result is consistent with the finding of Chen et al. (2020a), who showed that NH<sub>3</sub> did not significantly affect SOA formation from toluene/NO<sub>x</sub> photooxidation under dry condition. Interestingly, SMPS measurements demonstrated that the coexistence of SO<sub>2</sub> and NH<sub>3</sub> can considerably promote secondary aerosol  
170 formation (Fig. 7). After subtracting the inorganic components, it was seen that the net SOA yield could increase to 13.7% with the introduction of 200 ppb NH<sub>3</sub> and 234 ppb SO<sub>2</sub>, indicating the synergetic effects of NH<sub>3</sub> and SO<sub>2</sub> (Chu et al., 2016).

175 Another comment I have is that the enhancement of the SOA from the addition of SO<sub>2</sub> and/or NH<sub>3</sub> can also be attributed to the increase of the surface area from the formation of inorganic species, which shifts the gas-particle equilibrium more to the particle side. Can the authors discuss more about the effect of this shift of equilibrium? It seems Figure 4 shows that the first three experiments after adding SO<sub>2</sub> seem to follow this rule.

**Author Reply:**

180 An important mechanism of SOA formation and growth is gas-particle partitioning of semi-volatile compounds (SVOCs) generated from the atmospheric oxidation of VOCs. The gas-particle partitioning of SVOCs have a great sensitivity to particle surface areas in the batch-mode chamber experiments (Zhang et al., 2015; Han et al., 2019). Increasing particle surface area can limit the gas-wall interactions of organic  
185 vapors and is favorable for moving more SVOCs from the gas phase to the particle side

(Han et al., 2019). These additional SVOCs may undergo further particle chemistry to strongly enhance aerosol particle formation (Apsokardu and Johnston, 2018).

190 Recently, the effects of the particle surface area concentration on organic aerosol formation have been explored by Han et al. (2019), who found that increasing the particle surface area concentrations can significantly increase organic aerosol mass yield due to greater partitioning of semi-volatility organic products to the particle-phase. In addition, some studies have confirmed that the SOA yields depend on the surface areas of inorganic aerosols when condensation of organic vapors onto particles is kinetically limited (McVay et al., 2014; Nah et al., 2016; Zhang et al., 2014). In the  
195 present work, the surface area concentrations of aerosol particles increased with increasing mixing ratios of SO<sub>2</sub> and/or NH<sub>3</sub> inside the chamber (Table 1), which may facilitate the gas-particle equilibrium shifting to the particle phase. The particle surface area concentrations have been included in Table 1. Based on the suggestion of the Referee, we have enriched the discussion in the revised manuscript as following:

### 200 **3.1.2 SOA yield in SO<sub>2</sub>-added photooxidation**

Page 14, lines 422–438

In addition, the particle surface area concentrations significantly increased with increasing SO<sub>2</sub> initial concentrations in both low-NO<sub>x</sub> and high-NO<sub>x</sub> conditions (Table 1), which might also result in the enhancement in the SOA yield. Besides gas-particle  
205 partitioning of SVOCs, the fate of SVOCs in the chamber also include chemical reactions and chamber wall losses. Therefore, in the batch-mode chamber experiments, the gas-particle partitioning of SVOCs have a great sensitivity to particle surface areas (Zhang et al., 2015; Han et al., 2019). Recently, Zhao et al. (2018) examined the SO<sub>2</sub> effects on the SOA formation and suggested that providing additional particle surfaces  
210 by SO<sub>2</sub>-induced new particle formation leads to the increase in SOA yield. The effects of the particle surface area concentration on organic aerosol formation were explored by Han et al. (2019), who also found that increasing the particle surface area concentrations can significantly increase the organic aerosol mass yield due to greater partitioning of semi-volatility organic products to the particle-phase. Increasing the



215 particle surface area can limit the gas-wall interactions of organic vapors and is  
favorable for the movement of more SVOCs from the gas phase to the particle side  
(Han et al., 2019). These additional SVOCs can also undergo further particle chemistry  
such as acid-catalyzed heterogenous reactions to strongly enhance aerosol particle  
formation in TMB/NO<sub>x</sub>/SO<sub>2</sub> photooxidation (Apsokardu and Johnston, 2018).

### 220 **3.2.1 Particle formation and growth in NH<sub>3</sub>-involved photooxidation**

Page 20, lines 576–580

The flux of the gas-phase products diffusing to a particle partly depends on the  
surface area of the particle. The coexistence of SO<sub>2</sub> and NH<sub>3</sub> promoted the increase in  
particle surface area concentrations (Table 1). The ability of particle formation  
225 originating from gas-to-particle conversion may be significantly stronger with SO<sub>2</sub> and  
NH<sub>3</sub> introduction, leading to the enhancement in particle formation.

### **3.2.2 Particle chemical composition in NH<sub>3</sub>-involved photooxidation**

Page 23, lines 665–668

The introduction of SO<sub>2</sub> and NH<sub>3</sub> lead to the formation of ammonium sulfate (Fig.  
230 S12), which is an attractive condensation sink for organic vapors. High particle surface  
area concentration in TMB/NO<sub>x</sub>/SO<sub>2</sub>/NH<sub>3</sub> experiments may increase the abundance of  
organic compounds in the bulk phase.

#### **Minor Comment:**

235 L217: Can the author make an additional plot in the SI or show how the size dependent  
wall loss factor is generated?

#### **Author Reply:**

The wall-loss of particles are commonly evaluated by seed-only experiments where  
inert ammonium sulfate (AS) particles are used (Chen et al., 2019; Charan et al., 2020).  
240 In the current work, the AS solution was added to a TSI atomizer (Model 3076) to  
produce droplets, which passed simultaneously through a silica gel diffusion dryer to  
inject dry AS particles into the chamber. AS particles were lost to the chamber walls  
due to diffusion, gravitational settling, and electrostatic forces during experiment and

the mass size distributions of AS particles were measured by SMPS for 480 min.

245 The size-dependent particle wall-loss rate constants were determined based on the SMPS-measured particle size distribution. First-order loss rate constants ( $k_i$ ) of particles in each size bin  $i$  across all measured sizes were firstly calculated as the slope of the corresponding ln-linear fit line:

$$\ln[M_i(t)] = -k_i t + C \quad (\text{R1})$$

where  $M_i$  ( $\mu\text{g m}^{-3}$ ) is the mass concentration of particles in the size bin  $i$  at time  $t$  (min) and  $C$  is an arbitrary constant. Then, the relationship between the  $k_i$  and the particle diameter ( $d_{p,i}$ ) can be described as follows:

$$k_i(d_{p,i}) = ad_{p,i}^b + cd_{p,i}^{-d} \quad (\text{R2})$$

The optimized fitted line shown in Fig. R2 can express well our independent seed experimental results.

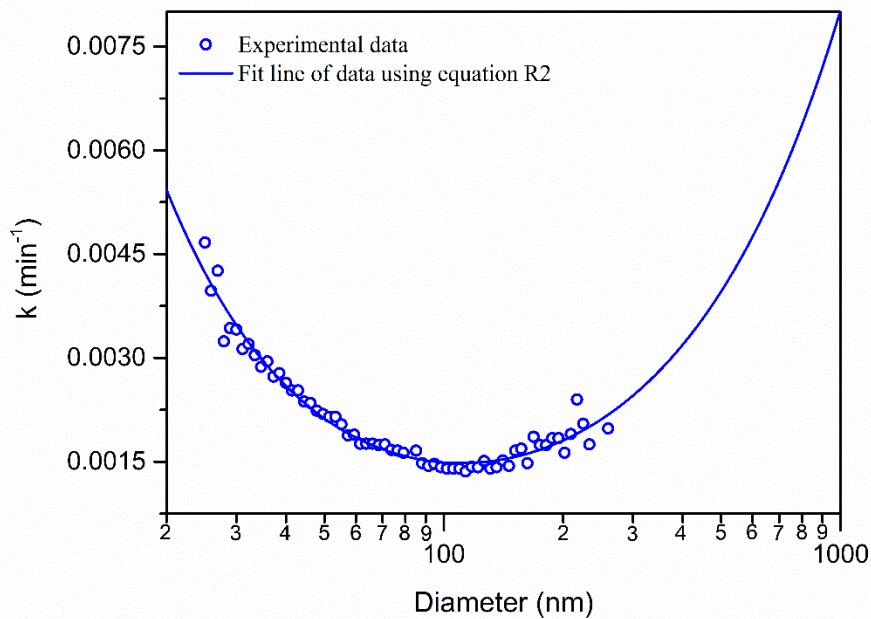

255 **Figure R2.** Wall loss rate constant of particles as a function of particle diameter.

The description about the wall loss experiments has been updated in the revised manuscript as follows:

260 **In order to determine the particles wall loss rates, we carried out independent wall loss experiments. An aqueous solution of ammonium sulfate was fed to a constant output**

atomizer (Model 3706, TSI, USA) to produce droplets, which passed simultaneously through a silica gel diffusion dryer to introduce dry particles into the chamber. The size distributions of ammonium sulfate particles were measured by SMPS for 480 min. The wall losses of particles are size-dependent and, thus, we used a size-dependent particle wall-loss correction approach, which is described in detail in the supplement.

Besides, the following text and Fig. R2 were added in the revised supplement to explain how the size dependent wall loss constant was obtained.

### S1. Size-dependent wall loss correction method

In the present work, the size-dependent particle wall-loss rate constants were determined based on the SMPS-measured particle size distribution. The first-order loss rate constants ( $k_i$ ) of particles in each size bin  $i$  across all measured sizes were firstly calculated as the slope of the corresponding ln-linear fit line:

$$\ln[M_i(t)] = -k_i t + C \quad (S1)$$

where  $M_i$  ( $\mu\text{g m}^{-3}$ ) is the mass concentration of particles in size bin  $i$  at time  $t$  (min) and  $C$  is an arbitrary constant. Then, the relationship between the  $k_i$  and the particle diameter ( $d_{p,i}$ ) can be described as follows:

$$k_i(d_{p,i}) = a d_{p,i}^b + c d_{p,i}^{-d} \quad (S2)$$

The optimized fitted line shown in Fig. S1 can express well our independent seed experimental results. Parameters  $a$ ,  $b$ ,  $c$ , and  $d$  in Eq. (S2) were determined to be  $5.5 \times 10^{-6}$ , 1.05, 0.18, 1.19, respectively. Therefore, the size-dependent loss rate ( $k$ ) of ammonium sulfate particles can be expressed as  $k = 5.5 \times 10^{-6} \times d_p^{1.05} + 0.18 \times d_p^{-1.19}$ .

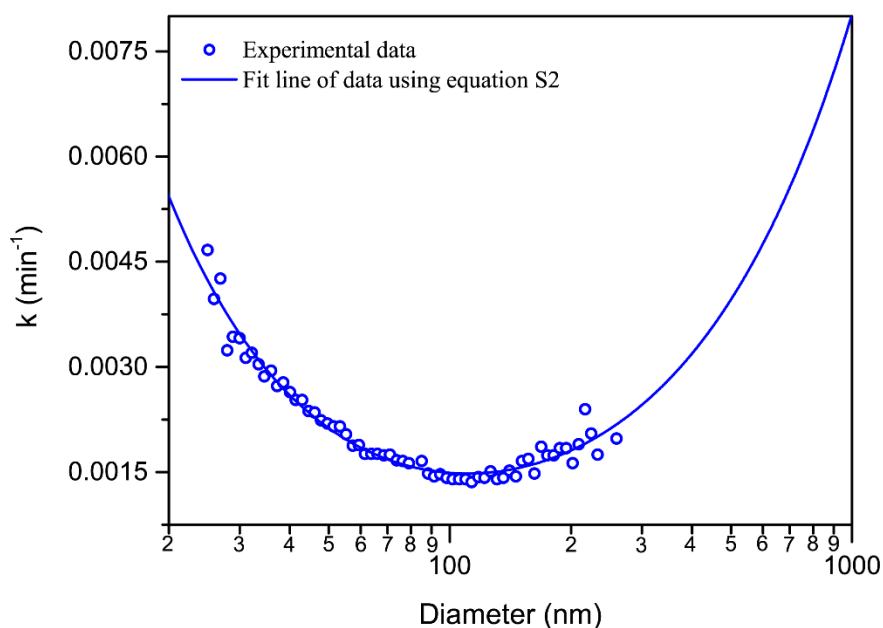

**Figure S1.** Wall loss rate constant of particles as a function of particle diameter.

285 Figure 1: It would be better to change the plots all in the same scale for easy comparison of different conditions.

**Author Reply:**

Figure 1 has been revised according to the comment of the Referee as follows:

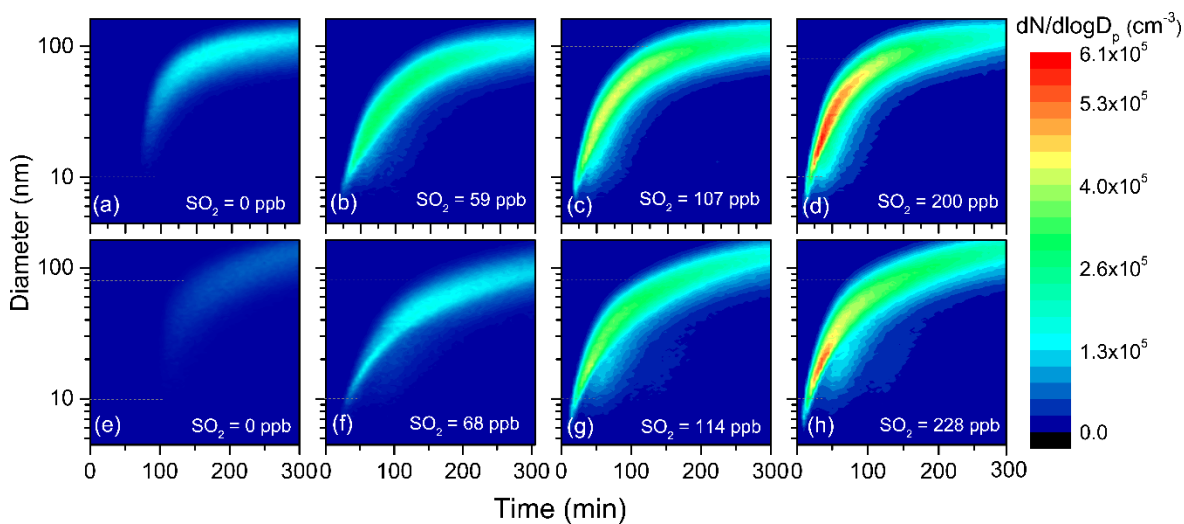

290 **Figure 1.** Evolutions of the number distributions of aerosol particles generated from TMB photooxidation in low-NO<sub>x</sub> (Panels a–d) and high-NO<sub>x</sub> (Panels e–h) experiments.

L305: an extra space before “to”

**Author Reply:**

295 The extra space has been deleted in the revised manuscript.

L367: Please add the recent paper by Chen et al. 2020 also demonstrate that OS-228 could be from isoprene-derived SOA.

**Author Reply:**

300 We have cited the study of Chen et al. (2020b) and added the related description. Please, refer to the last comment.

L389: The author should also consider adding Zhang et al. 2019 here, which discussed the effects of inorganic sulfates to organosulfates conversion in affecting aerosol growth, multiphase chemistry, and pH.

**Author Reply:**

The paper by Zhang et al. (2019) has now been cited and the original sentence was modified as follow:

310 The conversion of inorganic sulfates to organosulfates could cause changes in aerosol growth, multiphase chemistry, and acidity (Zhang et al., 2019; Riva et al., 2019).

L525: As mentioned, OS-228 was observed by Chen et al. 2020 from the aging of isoprene-SOA. Even though the source might be different from the OS-228 here, the author should mention it in the conclusion instead of defining OS-228 as from unknown source.

**Author Reply:**

320 We have carefully read the literature suggested by the Referee. Chen et al. (2020b) investigated the heterogeneous OH oxidation of 2-methyltetrol sulfate diastereomers and identified OS at  $m/z$  227 as the oxidation product of 2-methyltetrol sulfate diastereomers. Methyltetrol sulfates are significant tracers for isoprene-derived SOA. Therefore, the OH aging of isoprene SOA is also a potential source of OS-228 in the

atmosphere. The inappropriate conclusion has been removed in the revised manuscript. We have added the following text in Sect. 3.1.3 to describe the findings in the study by Chen et al. (2020b).

325 Page 18, lines 507–512

More recently, Chen et al. (2020b) suggested that heterogeneous OH oxidation of isoprene-derived SOA can contribute to the formation of an organosulfate with molecular weight at 228. Our results show the detection of OS-226, OS-228, OS-240, and OS-268 organosulfates, which are isomers of organosulfates derived from isoprene (Cai et al., 2020), isoprene (Chen et al., 2020b), limonene (Cai et al., 2020), and limonene (Boris et al., 2016), respectively.

330

#### References:

- 335 Chen, Y., et al. (2020). "Heterogeneous Hydroxyl Radical Oxidation of Isoprene-Epoxydiol-Derived Methyltetrol Sulfates: Plausible Formation Mechanisms of Previously Unexplained Organosulfates in Ambient Fine Aerosols." *Environmental Science & Technology Letters* 7(7): 460-468.
- Zhang, Y., et al. (2019). "Joint Impacts of Acidity and Viscosity on the Formation of Secondary Organic Aerosol from Isoprene Epoxydiols (IEPOX) in Phase Separated Particles." *ACS Earth and Space Chemistry* 3(12): 2646-2658.

340

## References

- 345 Apsokardu, M. J., and Johnston, M. V.: Nanoparticle growth by particle-phase chemistry, *Atmos. Chem. Phys.*, 18, 1895-1907, 10.5194/acp-18-1895-2018, 2018.
- Boris, A. J., Lee, T., Park, T., Choi, J., Seo, S. J., and Collett Jr, J. L.: Fog composition at Baengnyeong Island in the eastern Yellow Sea: detecting markers of aqueous atmospheric oxidations, *Atmos. Chem. Phys.*, 16, 437-453, 10.5194/acp-16-437-2016, 350 2016.
- Cai, D., Wang, X., Chen, J., and Li, X.: Molecular characterization of organosulfates in highly polluted atmosphere using ultra-high-resolution mass spectrometry, *J. Geophys. Res.-Atmos.*, 125, 10.1029/2019jd032253, 2020.
- 355 Charan, S. M., Buenconsejo, R. S., and Seinfeld, J. H.: Secondary organic aerosol yields from the oxidation of benzyl alcohol, *Atmos. Chem. Phys.*, 20, 13167-13190, 10.5194/acp-20-13167-2020, 2020.
- Chen, L., Bao, Z., Wu, X., Li, K., Han, L., Zhao, X., Zhang, X., Wang, Z., Azzi, M., and Cen, K.: The effects of humidity and ammonia on the chemical composition of secondary aerosols from toluene/NO<sub>x</sub> photo-oxidation, *Sci. Total Environ.*, 728, 360 138671, 10.1016/j.scitotenv.2020.138671, 2020a.
- Chen, T., Liu, Y., Ma, Q., Chu, B., Zhang, P., Liu, C., Liu, J., and He, H.: Significant source of secondary aerosol: formation from gasoline evaporative emissions in the presence of SO<sub>2</sub> and NH<sub>3</sub>, *Atmos. Chem. Phys.*, 19, 8063-8081, 10.5194/acp-19-8063-2019, 2019.
- 365 Chen, Y., Zhang, Y., Lambe, A. T., Xu, R., Lei, Z., Olson, N. E., Zhang, Z., Szalkowski, T., Cui, T., Vizuete, W., Gold, A., Turpin, B. J., Ault, A. P., Chan, M. N., and Surratt, J. D.: Heterogeneous Hydroxyl Radical Oxidation of Isoprene-Epoxydiol-Derived Methyltetrol Sulfates: Plausible Formation Mechanisms of Previously Unexplained Organosulfates in Ambient Fine Aerosols, *Environ. Sci. Technol. Lett.*, 7, 460-468, 370 10.1021/acs.estlett.0c00276, 2020b.
- Chu, B., Zhang, X., Liu, Y., He, H., Sun, Y., Jiang, J., Li, J., and Hao, J.: Synergetic formation of secondary inorganic and organic aerosol: effect of SO<sub>2</sub> and NH<sub>3</sub> on particle formation and growth, *Atmos. Chem. Phys.*, 16, 14219-14230, 2016.
- 375 Han, Y., Gong, Z., Liu, P., de Sá, S. S., McKinney, K. A., and Martin, S. T.: Influence of Particle Surface Area Concentration on the Production of Organic Particulate Matter in a Continuously Mixed Flow Reactor, *Environ. Sci. Technol.*, 53, 4968-4976, 10.1021/acs.est.8b07302, 2019.
- Jaoui, M., Edney, E. O., Kleindienst, T. E., Lewandowski, M., Offenberg, J. H., Surratt, J. D., and Seinfeld, J. H.: Formation of secondary organic aerosol from irradiated  $\alpha$ -pinene/toluene/NO<sub>x</sub> mixtures and the effect of isoprene and sulfur dioxide, *J. Geophys. Res.*, 113, 10.1029/2007jd009426, 2008.
- 380 Jiang, X., Chen, L., You, B., Liu, Z., Wang, X., and Du, L.: Joint impacts of atmospheric SO<sub>2</sub> and NH<sub>3</sub> on the formation of nanoparticles from photooxidation of a typical biomass burning compound, *Environmental Science: Nano*, 10.1039/d0en00520g, 385 2020.
- Kleindienst, T. E., Edney, E. O., Lewandowski, M., Offenberg, J. H., and Jaoui, M.:

- Secondary organic carbon and aerosol yields from the irradiations of isoprene and  $\alpha$ -pinene in the presence of  $\text{NO}_x$  and  $\text{SO}_2$ , *Environ. Sci. Technol.*, 40, 3807-3812, 10.1021/es052446r, 2006.
- 390 Liu, C., Chen, T., Liu, Y., Liu, J., He, H., and Zhang, P.: Enhancement of secondary organic aerosol formation and its oxidation state by  $\text{SO}_2$  during photooxidation of 2-methoxyphenol, *Atmos. Chem. Phys.*, 19, 2687-2700, 10.5194/acp-19-2687-2019, 2019.
- 395 Liu, T., Wang, X., Hu, Q., Deng, W., Zhang, Y., Ding, X., Fu, X., Bernard, F., Zhang, Z., Lu, S., He, Q., Bi, X., Chen, J., Sun, Y., Yu, J., Peng, P., Sheng, G., and Fu, J.: Formation of secondary aerosols from gasoline vehicle exhaust when mixing with  $\text{SO}_2$ , *Atmos. Chem. Phys.*, 16, 675-689, 10.5194/acp-16-675-2016, 2016.
- 400 McVay, R. C., Cappa, C. D., and Seinfeld, J. H.: Vapor–Wall Deposition in Chambers: Theoretical Considerations, *Environ. Sci. Technol.*, 48, 10251-10258, 10.1021/es502170j, 2014.
- Nah, T., McVay, R. C., Zhang, X., Boyd, C. M., Seinfeld, J. H., and Ng, N. L.: Influence of seed aerosol surface area and oxidation rate on vapor wall deposition and SOA mass yields: a case study with  $\alpha$ -pinene ozonolysis, *Atmos. Chem. Phys.*, 16, 9361-9379, 10.5194/acp-16-9361-2016, 2016.
- 405 Riva, M., Chen, Y., Zhang, Y., Lei, Z., Olson, N. E., Boyer, H. C., Narayan, S., Yee, L. D., Green, H. S., Cui, T., Zhang, Z., Baumann, K., Fort, M., Edgerton, E., Budisulistiorini, S. H., Rose, C. A., Ribeiro, I. O., RL, E. O., Dos Santos, E. O., Machado, C. M. D., Szopa, S., Zhao, Y., Alves, E. G., de Sa, S. S., Hu, W., Knipping, E. M., Shaw, S. L., Duvoisin Junior, S., de Souza, R. A. F., Palm, B. B., Jimenez, J. L.,
- 410 Glasius, M., Goldstein, A. H., Pye, H. O. T., Gold, A., Turpin, B. J., Vizuete, W., Martin, S. T., Thornton, J. A., Dutcher, C. S., Ault, A. P., and Surratt, J. D.: Increasing Isoprene Epoxydiol-to-Inorganic Sulfate Aerosol Ratio Results in Extensive Conversion of Inorganic Sulfate to Organosulfur Forms: Implications for Aerosol Physicochemical Properties, *Environ. Sci. Technol.*, 53, 8682-8694, 10.1021/acs.est.9b01019, 2019.
- 415 Vivanco, M. G., Santiago, M., Martinez-Tarifa, A., Borrás, E., Rodenas, M., Garcia-Diego, C., and Sanchez, M.: SOA formation in a photoreactor from a mixture of organic gases and HONO for different experimental conditions, *Atmos. Environ.*, 45, 708-715, 10.1016/j.atmosenv.2010.09.059, 2011.
- 420 Wyche, K. P., Monks, P. S., Ellis, A. M., Cordell, R. L., Parker, A. E., Whyte, C., Metzger, A., Dommen, J., Duplissy, J., Prevot, A. S. H., Baltensperger, U., Rickard, A. R., and Wulfert, F.: Gas phase precursors to anthropogenic secondary organic aerosol: detailed observations of 1,3,5-trimethylbenzene photooxidation, *Atmos. Chem. Phys.*, 9, 635-665, 10.5194/acp-9-635-2009, 2009.
- 425 Ye, J., Abbatt, J. P. D., and Chan, A. W. H.: Novel pathway of  $\text{SO}_2$  oxidation in the atmosphere: reactions with monoterpene ozonolysis intermediates and secondary organic aerosol, *Atmos. Chem. Phys.*, 18, 5549-5565, 10.5194/acp-18-5549-2018, 2018.
- Zhang, R., Wang, G., Guo, S., Zamora, M. L., Ying, Q., Lin, Y., Wang, W., Hu, M., and Wang, Y.: Formation of urban fine particulate matter, *Chem. Rev.*, 115, 3803-3855, 10.1021/acs.chemrev.5b00067, 2015.
- 430 Zhang, X., Cappa, C. D., Jathar, S. H., McVay, R. C., Ensber, J. J., Kleeman, M. J., and



Seinfeld, J. H.: Influence of vapor wall loss in laboratory chambers on yields of secondary organic aerosol, *P. Natl. Acad. Sci. USA*, 111, 5802-5807, 2014.

435 Zhang, Y., Chen, Y., Lei, Z., Olson, N. E., Riva, M., Koss, A. R., Zhang, Z., Gold, A., Jayne, J. T., Worsnop, D. R., Onasch, T. B., Kroll, J. H., Turpin, B. J., Ault, A. P., and Surratt, J. D.: Joint Impacts of Acidity and Viscosity on the Formation of Secondary Organic Aerosol from Isoprene Epoxydiols (IEPOX) in Phase Separated Particles, *ACS Earth Space Chem.*, 3, 2646-2658, 10.1021/acsearthspacechem.9b00209, 2019.

440 Zhao, D., Schmitt, S. H., Wang, M., Acir, I.-H., Tillmann, R., Tan, Z., Novelli, A., Fuchs, H., Pullinen, I., Wegener, R., Rohrer, F., Wildt, J., Kiendler-Scharr, A., Wahner, A., and Mentel, T. F.: Effects of NO<sub>x</sub> and SO<sub>2</sub> on the secondary organic aerosol formation from photooxidation of  $\alpha$ -pinene and limonene, *Atmos. Chem. Phys.*, 18, 1611-1628, 10.5194/acp-18-1611-2018, 2018.
